# Supplementary material
Source: PubMed Central journal article supplement (PMC2042163)

A

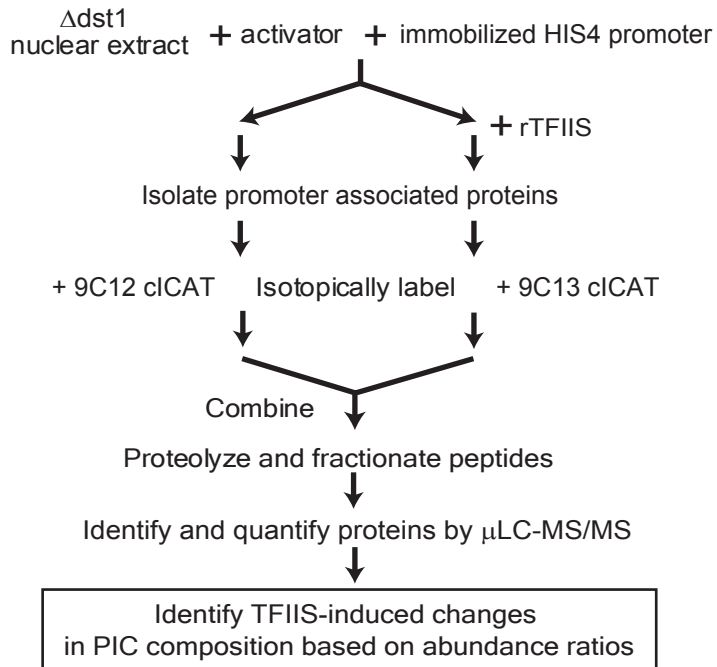

B

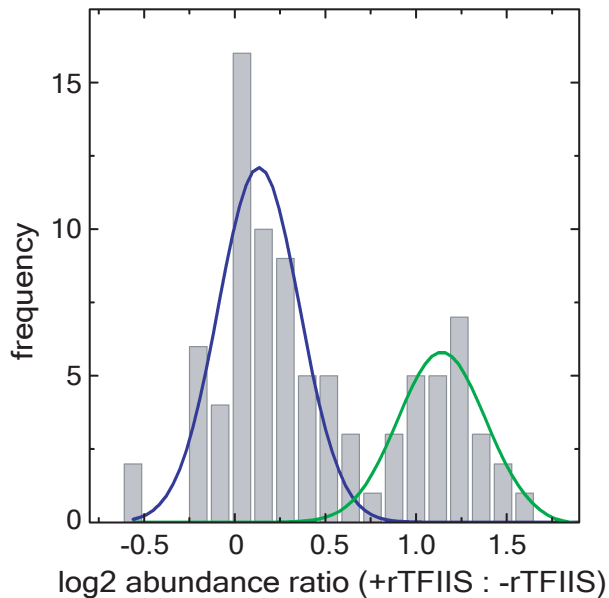

Supplement: pnas_0704573104_1.pdf [file pnas_0704573104_1.pdf]

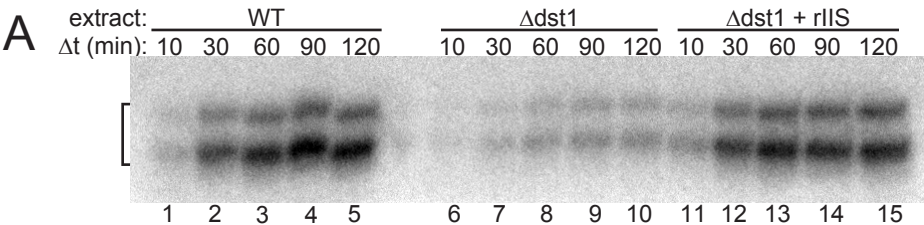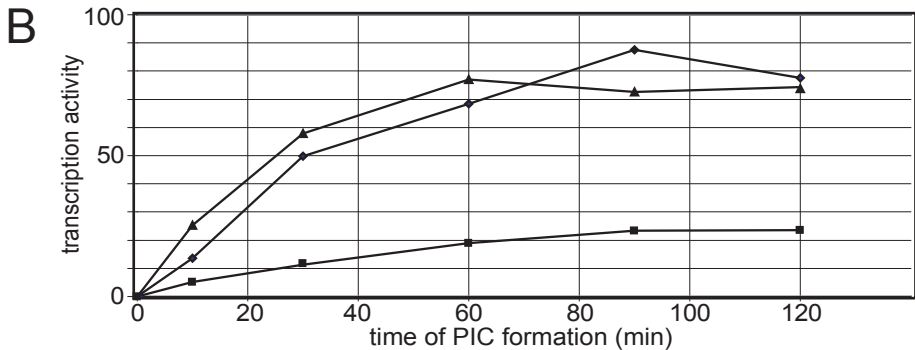

Supplement: pnas_0704573104_2.pdf [file pnas_0704573104_2.pdf]

rTFIIS:

133-265

1-265

1-130

131-309

1-309

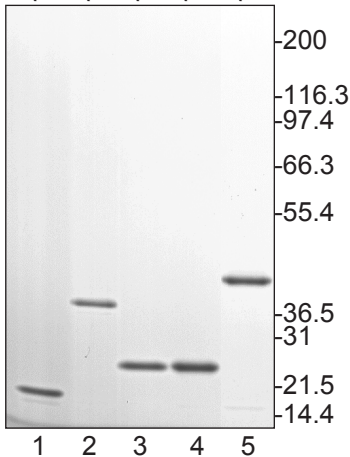

Supplement: pnas_0704573104_3.pdf [file pnas_0704573104_3.pdf]
